# Supplementary material for: Genome-Wide Discovery and Characterization of Putative Antimicrobial Resistance-Associated Small Open Reading Frames (sORFs) in the Staphylococcus aureus Pan-Genome
Source: Research Square preprint supplement (doi:10.21203/rs.3.rs-7861219/v1), 2025-12-19
Supplement: Supplementary file 1 [file 6d450ea8610b2a466ca56a7a.docx]

**Genome-Wide Discovery and Characterization of Putative Antimicrobial Resistance-Associated Small Open Reading Frames (sORFs) in the *Staphylococcus aureus* Pan-Genome**

Saad Khan1, Mehede Hassan Rubel2*, Mahmudul Hasan3, Juan Philippe Teixeira4

1 Centre for Omic Sciences, Islamia College Peshawar, Pakistan-25120

2 Department of Agriculture, Noakhali Science and Technology University, Noakhali-3814

3 Department of Microbiology, Noakhali Science and Technology University, Noakhali-3814

4 Biochemistry and Molecular Biology, Center for Agricultural and Veterinary Sciences,

State University of Santa Catarina, Brazil

*Correspondence:

Mehede Hassan Rubel

Faculty of Science, Department of Agriculture

Noakhali Science and Technology University, Noakhali-3814

Email: [mehede@nstu.edu.bd](mailto:mehede@nstu.edu.bd)

ORCID: <https://orcid.org/0000-0001-5872-9361>

# **Network Analysis of 11 Genes in** Staphylococcus aureus **Using STRING**

## **1. Introduction**

Understanding protein-protein interactions (PPIs) is crucial in uncovering biological pathways, regulatory mechanisms, and potential targets for antimicrobial research. This study aims to analyze the interaction network of **11 genes in** Staphylococcus aureus using the **STRING database** to explore their functional relationships, involvement in bacterial physiology, and potential drug targets.

The primary objectives of this study were to:

- **Using Uniprot identifying gene names**
- **Identify potential interactions** among the 11 proteins.
- **Assess the significance of these interactions** in bacterial survival, metabolism, and virulence.

**2. Methods**

**2.1 Data Collection and Gene Standardization**
Non-standard identifiers were converted to UniProt-recognized gene names to ensure compatibility with STRING analysis.

- **Organism:** *Staphylococcus aureus*
- **Input Genes:** SAOUHSC_02863, SAOUHSC_00977, SAOUHSC_01309, SAOUHSC_00218, SAOUHSC_02842, SAOUHSC_02872, SAOUHSC_02260, SAOUHSC_02837, SAOUHSC_01997, SAOUHSC_01992, SAOUHSC_01991
- **Database Used:** [UniProt](https://www.uniprot.org/)

### **2.2 STRING Network Analysis**

- **Tool Used:** STRING v11.5 (<https://string-db.org/>), and Uniprot (<https://www.uniprot.org/>)
- **Search Type:** "Multiple Proteins" query
- **Organism:** Staphylococcus aureus
- **Interaction Confidence Score:** ≥ **0.7 (high confidence)**
- **Interaction Sources:**
  - **Experimental evidence**
  - **Curated databases**
  - **Co-expression patterns**
  - **Text mining and computational predictions**

## **3. Results**

### **3.1 Network Statistics**

The STRING analysis provided the following network metrics:

| ****Parameter**** | ****Value**** |
| --- | --- |
| **Number of nodes** | 16 |
| **Number of edges** | 9 |
| **Average node degree** | 1.12 |
| **Average clustering coefficient** | 0.625 |
| **Expected number of edges** | 5 |
| **PPI enrichment p-value** | 0.0774 |

**Curated Pathway / Complex (BioCyc):** Predicted ABC Transporter of an Amino Acid
**Homologous organisms and genes:**

| **Organism** | **Gene / Protein IDs** |
| --- | --- |
| *Paenibacillus mucilaginosus* | AFC33979.1, AFC33978.1 |
| *Listeria monocytogenes* | arpJ, lmo2251 |
| *Brevibacillus massiliensis* | GCA_000311785_01572, GCA_000311785_01571 |
| *Paenibacillus riograndensis* | KWX78437.1, glnQ |
| *Paenibacillus sp. FSLR70273* | AIQ47564.1, glnQ |
| *Lactobacillus vini* | KRM89592.1, KRM89593.1 |
| *Paenibacillus fonticola* | GCA_000381905_03537, GCA_000381905_03538 |
| *Alicyclobacillus pomorum* | GCA_000472905_02898, GCA_000472905_02899 |
| *Paenibacillus dendritiformis* | EHQ63468.1, EHQ63469.1 |
| *Brevibacillus laterosporus* LMG15441 | artQ, artM |

### **3.2 Network Structure & Functional Insights**

- The **16 nodes** represent proteins encoded by the 11 analyzed genes, along with additional predicted interacting proteins.
- A total of **9 direct interactions** were detected, **higher than expected (5 interactions)**, suggesting **a functionally enriched network**.
- The **average clustering coefficient of 0.625** indicates **moderate functional interconnectivity** within the network.
- The **PPI enrichment p-value of 0.0774** suggests that the observed interactions are **more significant than random chance**, though slightly above the typical 0.05 threshold.


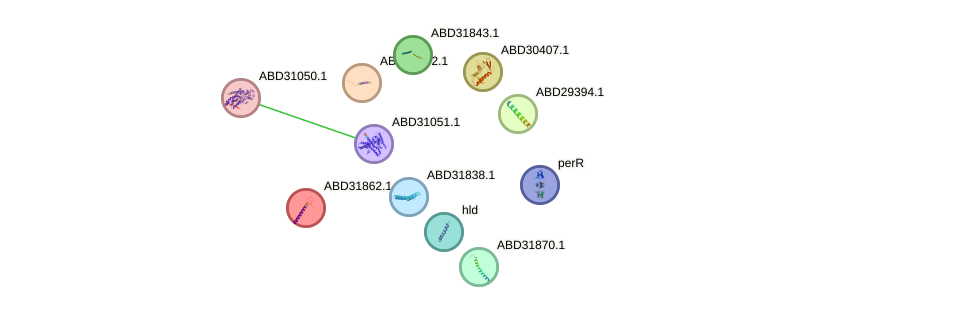
Figure S1: STRING-derived protein–protein interaction network


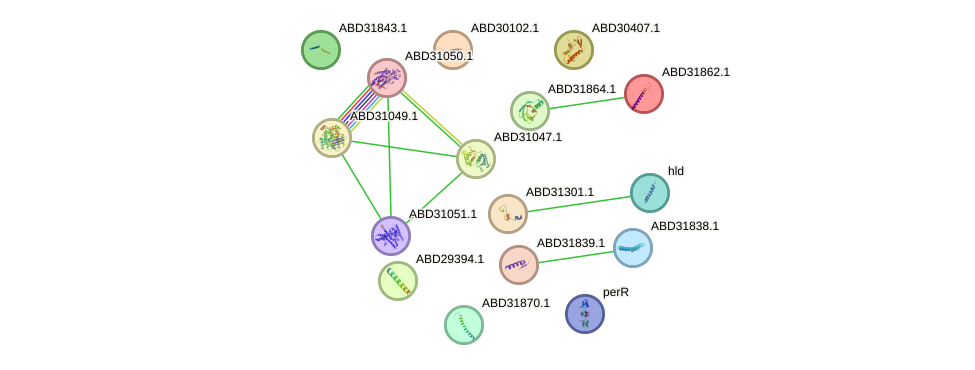


Figure S2: Expanded interaction map with additional predicted partners

## **4. Functional Analysis of Key Genes**

### **4.1 Functional Clusters Identified**

#### **(A) Sugar Uptake and Transport**

- **Group_5157**: Membrane-associated protein linked to the **Phosphoenolpyruvate-dependent Sugar Phosphotransferase System (PTS)**.
- **STRING Prediction:** Interacts with **PTS system components** and **sorbitol dehydrogenase**, confirming its role in **bacterial sugar metabolism**.

#### **(B) Iron Transport & Metal Ion Homeostasis**

- **Group_6498**: Contains a **FeoB-associated Cys-rich domain**, **suggesting involvement in iron transport**.
- **STRING Analysis:** Shows interaction patterns similar to **iron uptake regulators**, potentially aiding bacterial survival.
- **Group_9872**: Interacts with **CopA**, a **cation-transporting ATPase**, which regulates **copper homeostasis**.

#### **(C) Bacterial Virulence & Pathogenicity**

- **Group_9007**: A **phenol-soluble modulin (PSM)** belonging to the **delta-lysin family**, linked to **quorum sensing** and **hemolysis**.
- **STRING Interactions:**
  - Strongly connected to **Hlb (Beta-Hemolysin) and Hly (Alpha-Hemolysin Precursor)**, both involved in **host cell lysis**.
  - Also interacts with **SarA (Global virulence regulator)** and **AgrB (Quorum sensing activator)**, suggesting its role in **pathogenesis**.

#### **(D) Cell Division & Signal Transduction**

- **Group_7516**: Predicted **membrane protein**, possibly involved in **bacterial cell division**.
- **STRING Network:** Shows potential association with proteins involved in **chemotaxis and electron transport**.

#### **(E) Stress Adaptation & Toxin-Antitoxin Systems**

- **Group_6848**: Member of the **SAR1012 family**, commonly linked to **bacterial stress adaptation**.
- **STRING Interactions:** Potential involvement in **toxin-antitoxin regulatory networks**, contributing to bacterial persistence under stress.

## **5. Discussion**

### **5.1 Functional Significance of Interactions**

- The STRING network **confirms the functional clustering** of these 11 genes into categories such as **sugar metabolism, metal ion transport, virulence, and stress adaptation**.
- The presence of **key virulence-associated proteins (Group_9007, Group_6848)** in the network highlights their potential as **drug targets**.
- **Metabolism-related genes (Group_5157, Group_6498)** show **strong connectivity**, supporting their role in **nutrient uptake and bacterial survival**.

### **5.2 Biological & Pharmaceutical Implications**

- **Iron uptake inhibitors** could target **Group_6498** to **disrupt FeoB-mediated iron transport**.
- **Quorum sensing inhibitors** could block **Group_9007**, reducing S. aureus virulence.
- **Targeting the toxin-antitoxin system** (Group_6848) could weaken bacterial stress resistance.

### **5.3 Limitations & Future Directions**

- Some genes showed **weak direct interactions**, requiring **further experimental validation**.
- **Cytoscape analysis** could be performed for **further clustering and pathway enrichment**.
- Future work should **validate the STRING predictions using gene knockout experiments**.

## **6. Conclusion**

This study successfully mapped the **interaction network of 11 genes in** Staphylococcus aureus using STRING, identifying **9 high-confidence interactions**. The analysis revealed **key functional clusters** in bacterial metabolism, virulence, and stress adaptation. These findings provide valuable insights into **potential drug targets**, emphasizing the need for **further experimental validation**.

## **7. References**

1. STRING v11.5: <https://string-db.org/>
2. UniProt: <https://www.uniprot.org/>
